# Supplementary material for: Three-dimensional MgSiO3-coated SnO2/C nanostructures for efficient adsorption of heavy metal ions from aqueous solution
Source: Royal Society of Chemistry journal article supplement (doi:10.1039/c6ra11243a), 2016-01-01
Supplement: c6ra11243a1.pdf [file c6ra11243a1.pdf]

## Supplementary Information for

### Three-dimensional MgSiO<sub>3</sub>-coated SnO<sub>2</sub>/C nanostructures for efficient adsorption of heavy metal ions from aqueous solution

Tianli Han<sup>a</sup>, Xiaoman Zhang<sup>b,c</sup>, Xiangqian Fu<sup>b,c</sup>, Jinyun Liu<sup>b,d,\*</sup>

<sup>a</sup> College of Chemical Engineering and Life Sciences, Chaohu University, Chaohu, Anhui  
238000, P.R. China

<sup>b</sup> Nanomaterials and Environment Detection Laboratory, Institute of Intelligent Machines,  
Chinese Academy of Sciences, Hefei, Anhui 230031, P.R. China

<sup>c</sup> Department of Chemistry, University of Science and Technology of China, Hefei, Anhui  
230026, P.R. China

<sup>d</sup> Beckman Institute for Advanced Science and Technology, University of Illinois at  
Urbana-Champaign, Urbana, Illinois 61801, USA

\* Address correspondence to J. Y. Liu.

E-mail: jyliu@iim.ac.cn

Tel.: 1-217-721-2414

**Preparation of MgSiO<sub>3</sub> spheres:** it contains two steps: 1) preparation of SiO<sub>2</sub> sphere template; 2) hydrothermal synthesis of MgSiO<sub>3</sub> on the basis of templates.

1) SiO<sub>2</sub> spheres as templates were prepared through a Stöber method. Typically, 8 mL of de-ionized water and 2 mL of ammonium hydroxide were mixed with 40 mL of ethanol. Then, 0.6 mL of tetraethylorthosilicate (TEOS) (Sigma-Aldrich Corp.) was added dropwise into the solution under constant stirring. After 2 h, the white precipitation was collected using centrifuge, and washed thoroughly with ethanol and deionized water. In order to increase the size of SiO<sub>2</sub>, the obtained precipitation was re-dispersed into the starting solution of ammonium hydroxide, ethanol and water; then repeat with adding TEOS and following steps. The obtained SiO<sub>2</sub> spheres were dried at 60 °C in an oven for further use.

2) The procedures for MgSiO<sub>3</sub> growth are similar to the synthesis using SnO<sub>2</sub>/C templates with some modifications (the increased temperature and extended time ensure the removal of SiO<sub>2</sub> templates under basic environment). In a typical procedure, 0.1 g of Mg(NO<sub>3</sub>)<sub>2</sub>·6H<sub>2</sub>O, 0.2 g of NH<sub>4</sub>Cl and 0.8 mL of concentrated ammonia solution were added into 30 ml of DI water under stirring. Then 0.1 g of the SiO<sub>2</sub> spheres was dispersed into the solution. The solution was transferred into a 50 mL Teflon-lined steel autoclave. The autoclave was sealed, heated at 160 °C for 12 h and allowed to cool naturally to room temperature. The sample was collected, washed thoroughly with ethanol and deionized water, and was dried at 60 °C.

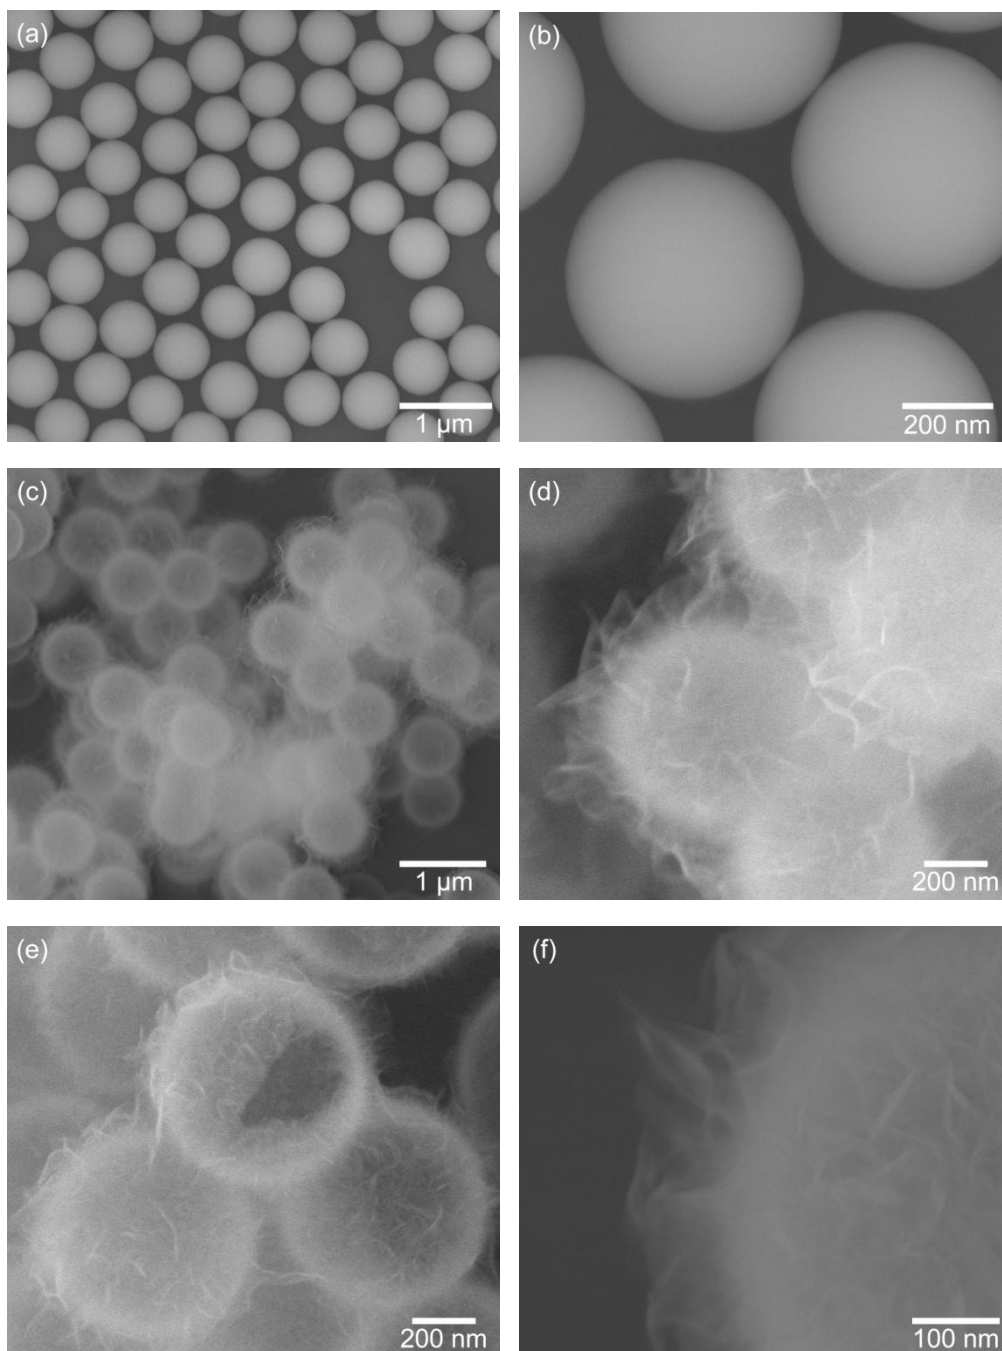

**Fig. S1.** SEM images of (a), (b) the prepared  $\text{SiO}_2$  spheres using as templates, and (c)-(f)  $\text{MgSiO}_3$  nanospheres obtained through hydrothermal synthesis. In (e), the hollow structure of these spheres is confirmed.

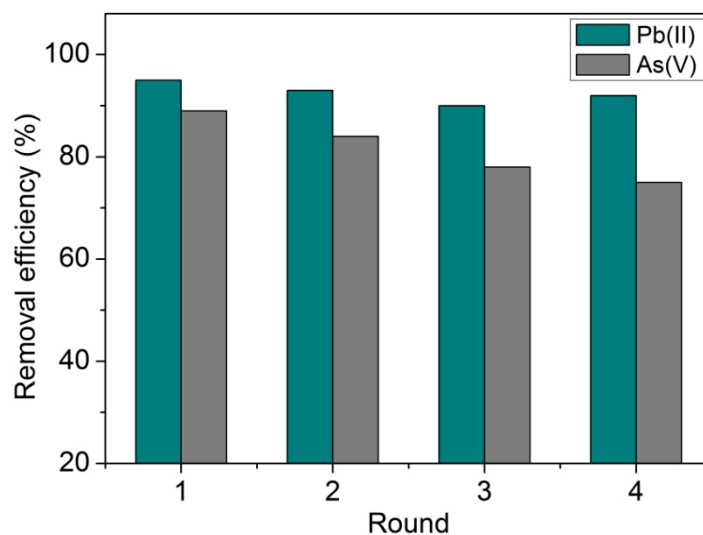

**Fig. S2.** Recycling of the  $\text{MgSiO}_3$ -coated  $\text{SnO}_2/\text{C}$  adsorbents using  $\text{NaOH}/\text{Mg}^{2+}$  solution as the desorbing solution. 1) Adsorption conditions:  $C_{\text{initial}}$ ,  $10 \text{ mg L}^{-1}$ ; adsorbent dose,  $20 \text{ mg}$  into  $30 \text{ mL}$  target solution; adsorption time,  $4 \text{ h}$ ; room temperature. 2) Desorption conditions: regeneration solution,  $0.5 \text{ M NaOH}$  and  $10 \text{ mg L}^{-1} \text{ Mg}^{2+}$  in DI water; desorption time,  $2 \text{ h}$ ; room temperature; collected by centrifuge, and washed with water and ethanol.
